# Supplementary material for: State of vulnerable populations in the techquity framework in Hungary
Source: Frontiers journal article supplement (doi:10.3389/fpubh.2023.1215325), 2023-07-06
Supplement: Data_Sheet_1.PDF [file Data_Sheet_1.PDF]

## *Supplementary Material*

# State of Vulnerable Populations in the Techquity Framework in Hungary

**Zsuzsa Gyórrffy\*, Bence Döbrössy, Nóra Radó, Sándor Békási**

**\* Correspondence:** Zsuzsa Gyórrffy: gyorffy.zsuzsanna@med.semmelweis-univ.hu

### Supplementary Data

**Table 1 – Socio-demographical distribution of older adults** as seen in the nationwide, representative “E-patients in Hungary” population survey of 1,500 people. Data collection took place between October 5-13, 2021 lead by the Digital Health Work Group of the Institute of Behavioral Sciences, Semmelweis University. The research was implemented under the OTKA -FK 134372 basic program of Hungary.

Girasek, E., Boros, J., Döbrössy, B., Susánszky, A., & Gyórrffy, Z. (2022). E-páciensek Magyarországon: Digitális egészséggel kapcsolatos ismeretek, szokások egy országos reprezentatív felmérés tükrében, *Orvosi Hetilap*, 163(29), 1159-1165. doi: <https://doi.org/10.1556/650.2022.32512>

| Demographics                       |   | 18 - 64 years old | 65-74 years old | 75+ years old |
|------------------------------------|---|-------------------|-----------------|---------------|
| <b>Gender</b>                      |   |                   |                 |               |
| Male                               | n | 651               | 100             | 51            |
|                                    | % | 50,3%             | 40,7%           | 28,0%         |
| Female                             | n | 643               | 146             | 131           |
|                                    | % | 49,7%             | 59,3%           | 72,0%         |
| Total                              | n | 1294              | 246             | 182           |
| <b>Level of education</b>          |   |                   |                 |               |
| Elementary school or lower         | n | 231               | 136             | 107           |
|                                    | % | 17,8%             | 55,5%           | 58,8%         |
| Vocational school / skilled worker | n | 348               | 27              | 12            |
|                                    | % | 26,9%             | 11,0%           | 6,6%          |
| High school                        | n | 456               | 51              | 44            |
|                                    | % | 35,2%             | 20,8%           | 24,2%         |

|                            |   |       |       |       |
|----------------------------|---|-------|-------|-------|
| Higher education           | n | 260   | 31    | 19    |
|                            | % | 20,1% | 12,7% | 10,4% |
| Total                      | n | 1295  | 245   | 182   |
| <b>Type of residence</b>   |   |       |       |       |
| Budapest                   | n | 223   | 41    | 47    |
|                            | % | 17,2% | 16,7% | 25,8% |
| County capital, large city | n | 240   | 41    | 29    |
|                            | % | 18,5% | 16,7% | 15,9% |
| Other city                 | n | 459   | 85    | 59    |
|                            | % | 35,5% | 34,7% | 32,4% |
| Village                    | n | 372   | 78    | 47    |
|                            | % | 28,7% | 31,8% | 25,8% |
| Total                      | n | 1294  | 245   | 182   |

**Table 2 – Socio-demographical distribution of people living with long-term activity limiting conditions** as seen in the nationwide, representative “E-patients in Hungary” population survey of 1,500 people. Data collection took place between October 5-13, 2021 lead by the Digital Health Work Group of the Institute of Behavioral Sciences, Semmelweis University. The research was implemented under the OTKA -FK 134372 basic program of Hungary.

Boros J, Girasek E, Döbrösy B, Gyorffy Z. Use of digital healthcare among people living with disabilities. Hungarian Journal of Disability Studies & Special Education 2022;2022/2 (Special Issue). doi:DOI 10.3128

| Key Demographics           | Representative sample |       | People living with long-term activity-limiting conditions |
|----------------------------|-----------------------|-------|-----------------------------------------------------------|
| Male                       | n                     | 586   | 99                                                        |
|                            | %                     | 48.1% | 36.7%                                                     |
| Female                     | n                     | 633   | 173                                                       |
|                            | %                     | 51.9% | 63.6%                                                     |
| Total                      | n                     | 1219  | 272                                                       |
| Elementary school or lower | n                     | 274   | 136                                                       |
|                            | %                     | 22.4% | 50.1%                                                     |
|                            | n                     | 292   | 42                                                        |

|                                    |   |       |       |
|------------------------------------|---|-------|-------|
| Vocational school / skilled worker | % | 23.9% | 16.7% |
| High school                        | n | 415   | 65    |
|                                    | % | 34%   | 23.9% |
| Higher education                   | n | 239   | 28    |
|                                    | % | 19.6% | 10.3% |
| Total                              | n | 1220  | 271   |
| Budapest                           | n | 230   | 40    |
|                                    | % | 18.9% | 14.6% |
| County capital, large city         | n | 223   | 45    |
|                                    | % | 18.3% | 16.4% |
| Other city                         | n | 431   | 93    |
|                                    | % | 35.3% | 34%   |
| Village                            | n | 336   | 95    |
|                                    | % | 27.5% | 34.7% |
| Total                              | n | 1220  | 273   |
| 18-29-year-olds                    | n | 249   | 22    |
|                                    | % | 20.4% | 8%    |
| 30-39-year-olds                    | n | 275   | 20    |
|                                    | % | 22.6% | 7.3%  |
| 40-49-year-olds                    | n | 214   | 24    |
|                                    | % | 17.6% | 8.8%  |
| 50-59-year-olds                    | n | 215   | 47    |
|                                    | % | 17.6% | 17.2% |
| Above 60 years                     | n | 266   | 159   |
|                                    | % | 21%   | 58.7% |
| Total                              | n | 1219  | 272   |

**Table 3 – Socio-demographical distribution of people experiencing homelessness as measured in Győrffy Z, Békási S, Döbrössy B, Bognár VK, Radó N, Morva E, et al. (2022) Exploratory attitude survey of homeless persons regarding telecare services in shelters providing mid- and long-term accommodation: The importance of trust. PLoS ONE 17(1): e0261145.**  
<https://doi.org/10.1371/journal.pone.0261145>

For comparative analysis, in the case of the reference group, correctional weighting procedure was also executed in order to match it with the homeless group: gender and educational level weights were calculated and used in the following comparative analysis.

| Key Demographics                       | Homeless persons |       | Reference population | Reference population (weighted) |
|----------------------------------------|------------------|-------|----------------------|---------------------------------|
|                                        | n                |       |                      |                                 |
| Male                                   | n                | 89    | 61                   | 103                             |
|                                        | %                | 90.8% | 55.5%                | 92%                             |
| Female                                 | n                | 9     | 49                   | 9                               |
|                                        | %                | 9.2%  | 44.5%                | 8%                              |
| Total                                  | n                | 98    | 110                  | 112                             |
| Less than 8 years of elementary school | n                | 3     | 3                    | 4                               |
|                                        | %                | 3.1%  | 2.7%                 | 3.6%                            |
| Elementary school                      | n                | 25    | 6                    | 19                              |
|                                        | %                | 25.8% | 5.5%                 | 17%                             |
| Vocational school                      | n                | 48    | 25                   | 69                              |
|                                        | %                | 49.5% | 22.7%                | 61.6%                           |
| High school                            | n                | 15    | 29                   | 14                              |
|                                        | %                | 15.5% | 26.4%                | 12.5%                           |
| Higher education                       | n                | 6     | 47                   | 6                               |
|                                        | %                | 6.2%  | 42.7%                | 5.4%                            |
| Total                                  | n                | 91    | 100                  | 112                             |
| 18-29-year-olds                        | n                | 249   | 12                   | 22                              |
|                                        | %                | 20.4% | 10.9%                | 8%                              |
| 30-39-year-olds                        | n                | 275   | 17                   | 20                              |
|                                        | %                | 22.6% | 15.4%                | 7.3%                            |
| 40-49-year-olds                        | n                | 214   | 19                   | 24                              |
|                                        | %                | 17.6% | 17.2%                | 8.8%                            |
| 50-59-year-olds                        | n                | 215   | 28                   | 47                              |
|                                        | %                | 17.6% | 25.4                 | 17.2%                           |
| Above 60 years                         | n                | 266   | 34                   | 159                             |
|                                        | %                | 21%   | 30.9%                | 58.7%                           |
| Total                                  | n                | 98    | 110                  | 112                             |

**Table 4 – Socio-demographical distribution of people experiencing homelessness as measured in Radó N, Girasek E, Békási S, Györffy Z. *Digital Technology Access and Health-Related Internet Use Among People Experiencing Homelessness in Hungary: Quantitative Survey*. J Med Internet Res 2022;24(10):e38729**

The representative sample indicates the sample in the nationwide, representative “E-patients in Hungary” population survey of 1,500 people mentioned above.

| Key Demographics           | Homeless persons |       | Representative sample |
|----------------------------|------------------|-------|-----------------------|
| Male                       | n                | 459   | 586                   |
|                            | %                | 71.2% | 48.1%                 |
| Female                     | n                | 203   | 633                   |
|                            | %                | 28.8% | 51.9%                 |
| Total                      | n                | 662   | 1219                  |
| Elementary school or lower | n                | 252   | 274                   |
|                            | %                | 38.1% | 22.4%                 |
| Vocational school          | n                | 232   | 292                   |
|                            | %                | 35%   | 23.9%                 |
| High school                | n                | 135   | 415                   |
|                            | %                | 20.4% | 34%                   |
| Higher education           | n                | 30    | 239                   |
|                            | %                | 4.5%  | 19.6%                 |
| Total                      | n                | 662   | 1220                  |
| 18-44-year-olds            | n                | 165   | 738                   |
|                            | %                | 25.9% | 60.6%                 |
| 50-59-year-olds            | n                | 233   | 215                   |
|                            | %                | 35.3% | 17.6%                 |
| Above 60 years             | n                | 247   | 266                   |
|                            | %                | 38.8% | 21%                   |
| Total                      | n                | 650   | 1220                  |
